# Supplementary figures and images for: Single-view 3D reconstruction via dual attention
Source: PeerJ journal article supplement (doi:10.7717/peerj-cs.2403), 2024-10-22

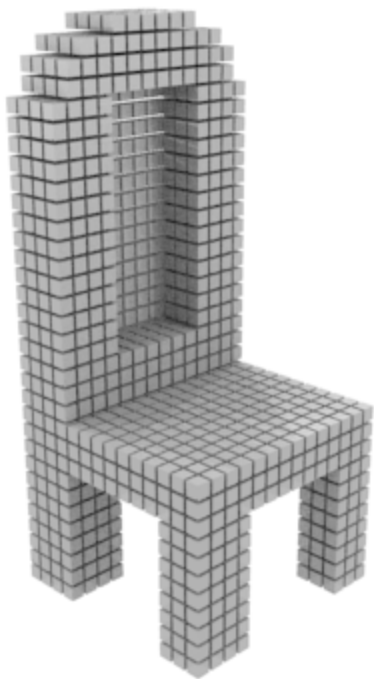

Supplement: GroundTruth.zip [file cs-100114-GT3b3a9f4e3aa9f2f4d39a194653571dfc.pdf › GroundTruth/cs-100114-GT3b3a9f4e3aa9f2f4d39a194653571dfc.pdf]

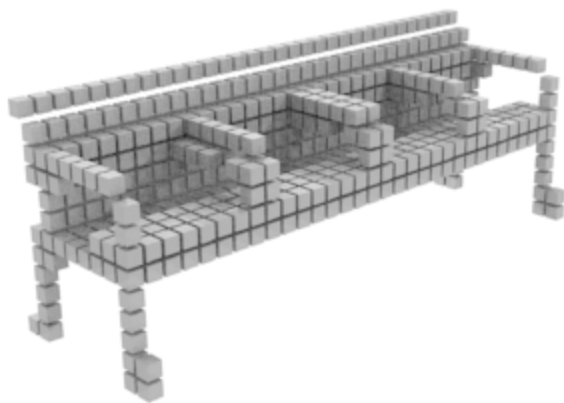

Supplement: GroundTruth.zip [file cs-100114-GT_longchair.pdf › GroundTruth/cs-100114-GT_longchair.pdf]

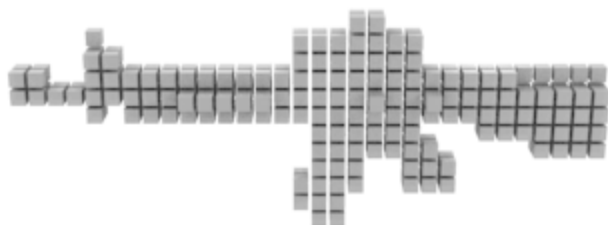

Supplement: GroundTruth.zip [file cs-100114-GT_rifle.pdf › GroundTruth/cs-100114-GT_rifle.pdf]

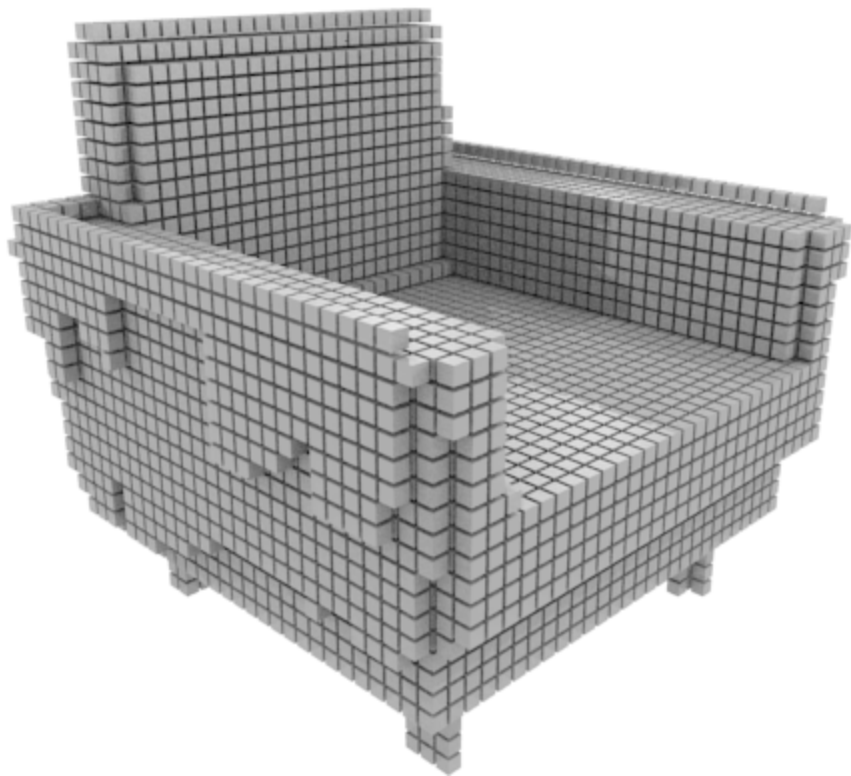

Supplement: GroundTruth.zip [file cs-100114-GTbe4c88a130e622a21961e650f3cfa396.pdf › GroundTruth/cs-100114-GTbe4c88a130e622a21961e650f3cfa396.pdf]

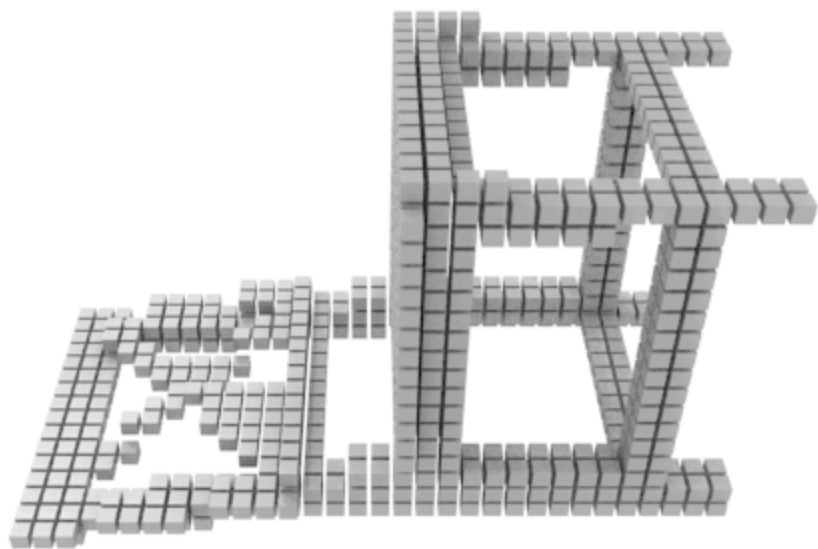

Supplement: GroundTruth.zip [file cs-100114-chair_gt.pdf › GroundTruth/cs-100114-chair_gt.pdf]

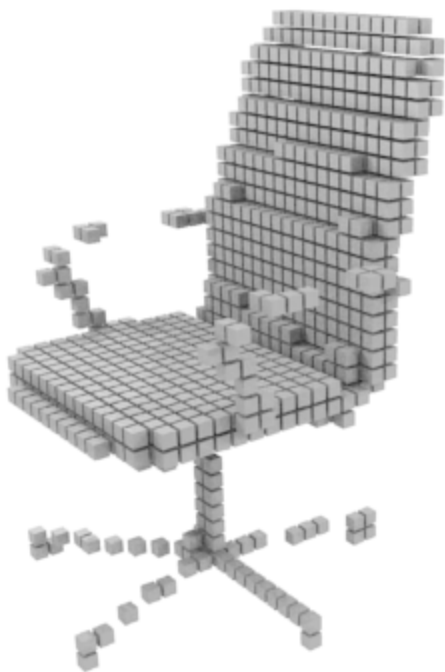

Supplement: GroundTruth.zip [file cs-100114-pix3d_GT00.pdf › GroundTruth/cs-100114-pix3d_GT00.pdf]

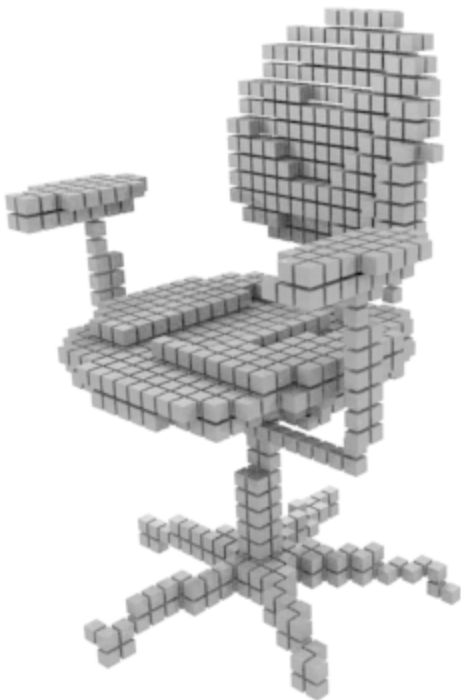

Supplement: GroundTruth.zip [file cs-100114-pix3d_GT01.pdf › GroundTruth/cs-100114-pix3d_GT01.pdf]

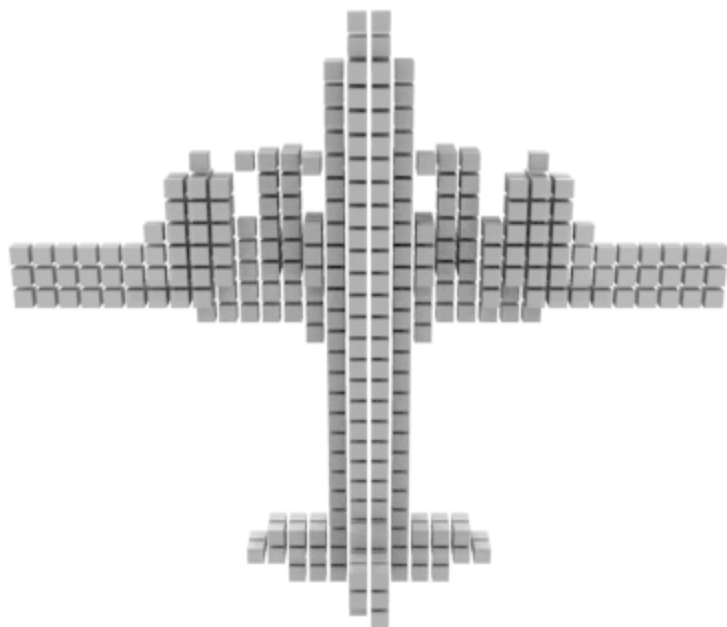

Supplement: GroundTruth.zip [file cs-100114-plane_gt.pdf › GroundTruth/cs-100114-plane_gt.pdf]

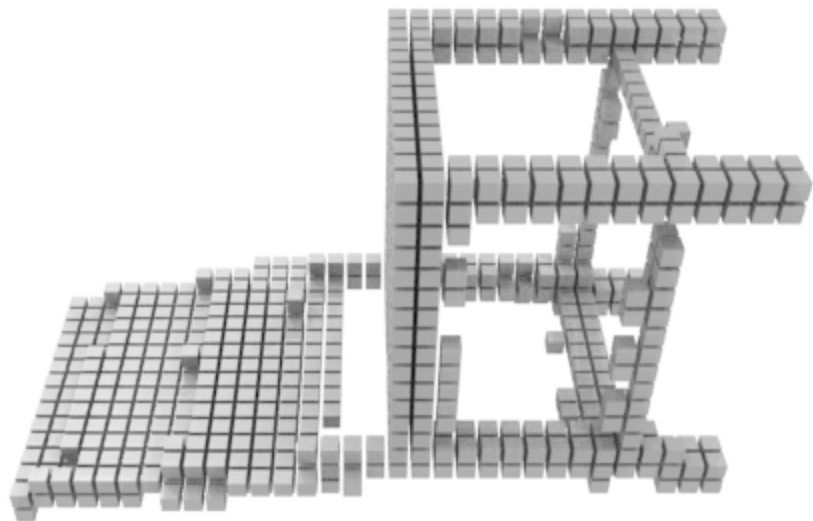

Supplement: ResultFromOurMethod.zip [file cs-100114-R3DSWINchair.pdf › ResultFromOurMethod/cs-100114-R3DSWINchair.pdf]

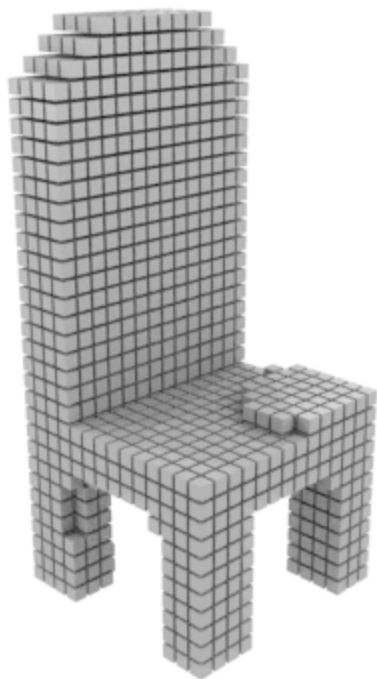

Supplement: ResultFromOurMethod.zip [file cs-100114-R3Davit3b3a9f4e3aa9f2f4d39a194653571dfc.pdf › ResultFromOurMethod/cs-100114-R3Davit3b3a9f4e3aa9f2f4d39a194653571dfc.pdf]

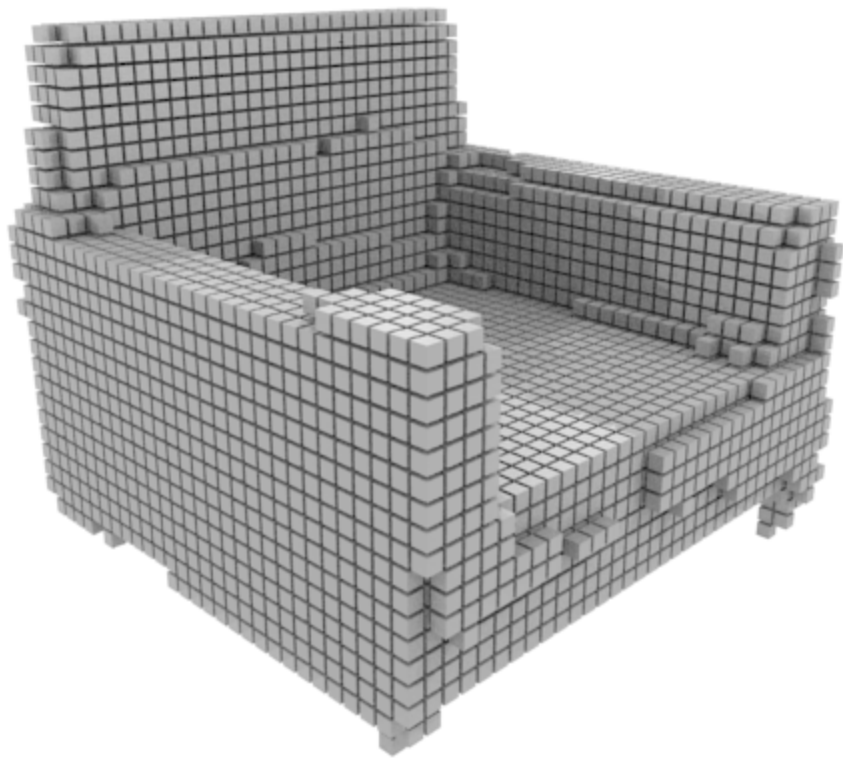

Supplement: ResultFromOurMethod.zip [file cs-100114-R3Davitbe4c88a130e622a21961e650f3cfa396.binvox.pdf › ResultFromOurMethod/cs-100114-R3Davitbe4c88a130e622a21961e650f3cfa396.binvox.pdf]

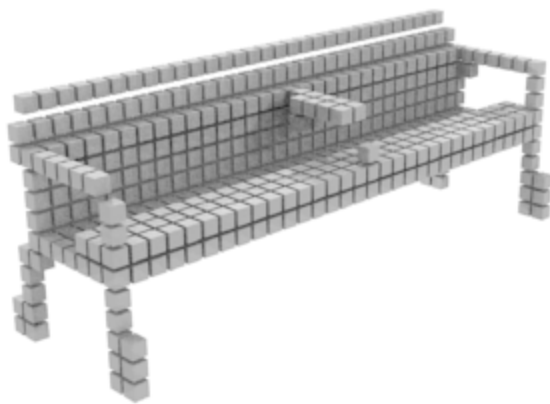

Supplement: ResultFromOurMethod.zip [file cs-100114-R3dswin_longchair.pdf › ResultFromOurMethod/cs-100114-R3dswin_longchair.pdf]

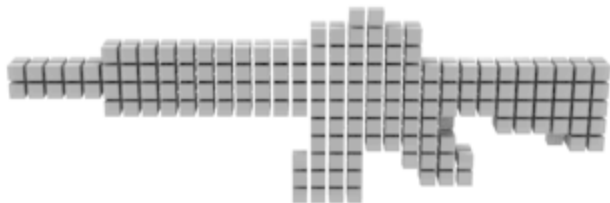

Supplement: ResultFromOurMethod.zip [file cs-100114-R3dswinrifle.pdf › ResultFromOurMethod/cs-100114-R3dswinrifle.pdf]

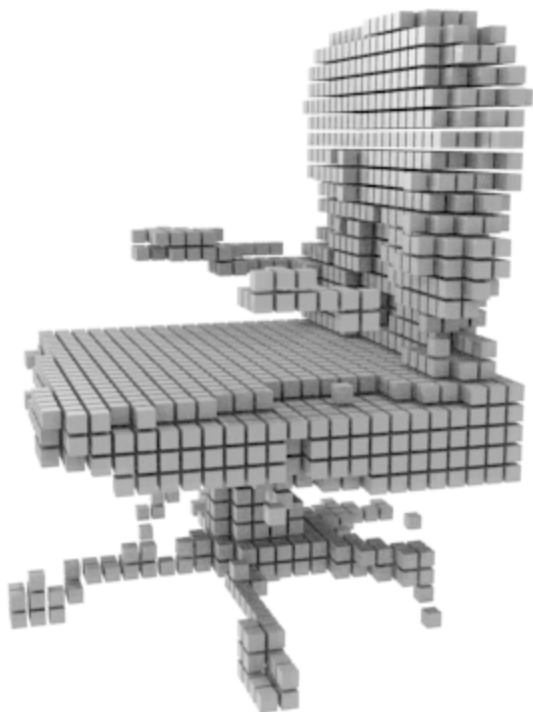

Supplement: ResultFromOurMethod.zip [file cs-100114-pix3d_R3DSWIN_00.pdf › ResultFromOurMethod/cs-100114-pix3d_R3DSWIN_00.pdf]

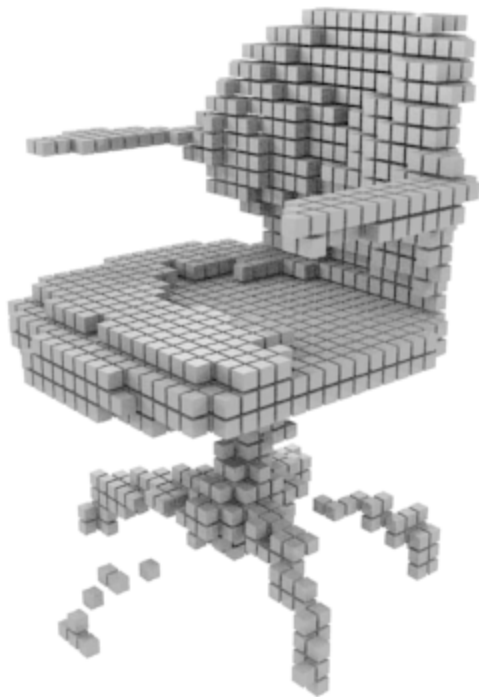

Supplement: ResultFromOurMethod.zip [file cs-100114-pix3d_R3DSWIN_01.pdf › ResultFromOurMethod/cs-100114-pix3d_R3DSWIN_01.pdf]

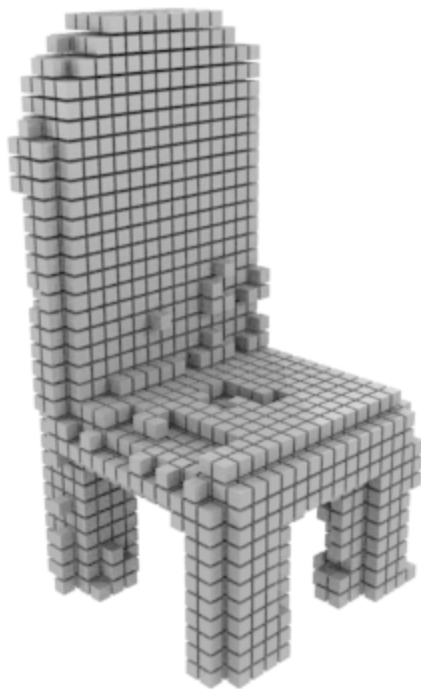

Supplement: result_from_3dretr.zip [file cs-100114-3dretr3b3a9f4e3aa9f2f4d39a194653571dfc.pdf › result_from_3dretr/cs-100114-3dretr3b3a9f4e3aa9f2f4d39a194653571dfc.pdf]

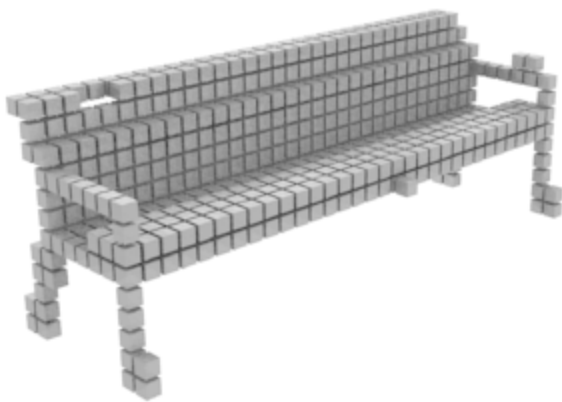

Supplement: result_from_3dretr.zip [file cs-100114-3dretr_longchair.pdf › result_from_3dretr/cs-100114-3dretr_longchair.pdf]

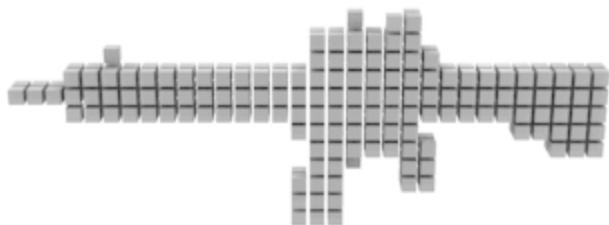

Supplement: result_from_3dretr.zip [file cs-100114-3dretr_rifle.pdf › result_from_3dretr/cs-100114-3dretr_rifle.pdf]

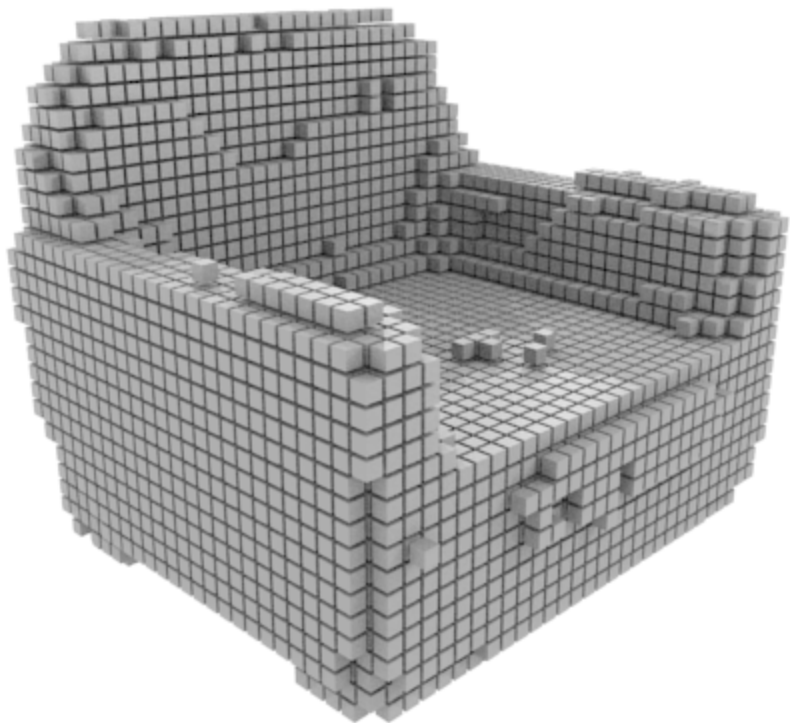

Supplement: result_from_3dretr.zip [file cs-100114-3dretrbe4c88a130e622a21961e650f3cfa396.pdf › result_from_3dretr/cs-100114-3dretrbe4c88a130e622a21961e650f3cfa396.pdf]

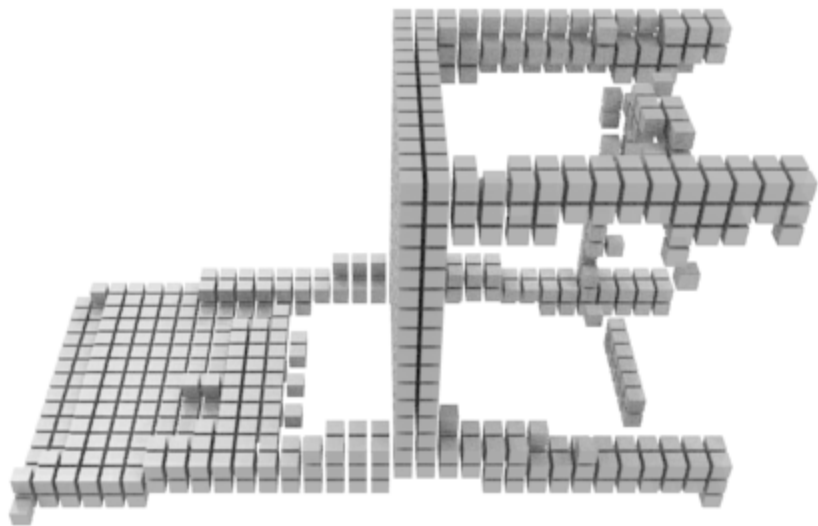

Supplement: result_from_3dretr.zip [file cs-100114-3dretrchair.pdf › result_from_3dretr/cs-100114-3dretrchair.pdf]

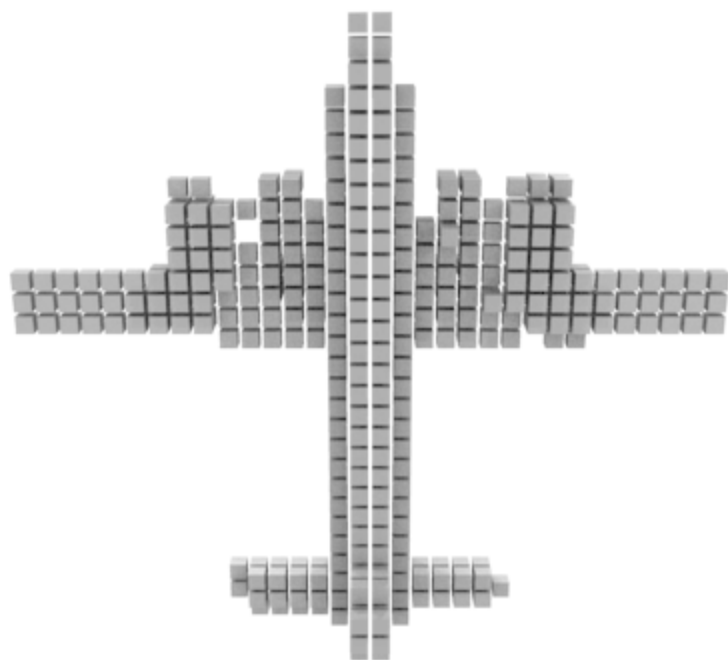

Supplement: result_from_3dretr.zip [file cs-100114-3dretrplane.pdf › result_from_3dretr/cs-100114-3dretrplane.pdf]

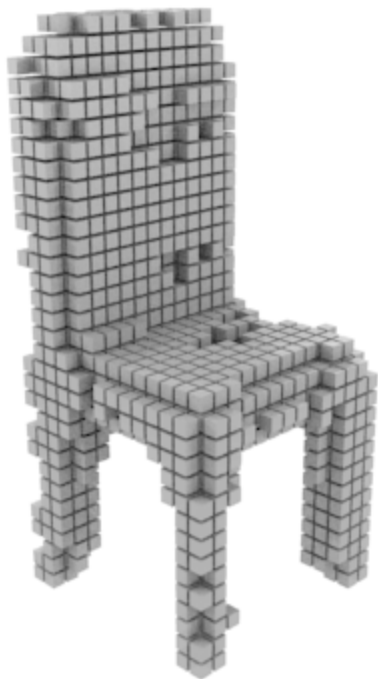

Supplement: result_from_pix2vox.zip [file cs-100114-pix2vox++3b3a9f4e3aa9f2f4d39a194653571dfc.pdf › result_from_pix2vox/cs-100114-pix2vox++3b3a9f4e3aa9f2f4d39a194653571dfc.pdf]

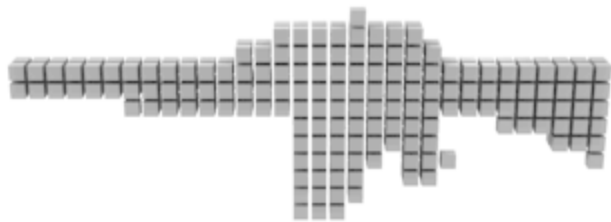

Supplement: result_from_pix2vox.zip [file cs-100114-pix2vox++_rifle.pdf › result_from_pix2vox/cs-100114-pix2vox++_rifle.pdf]

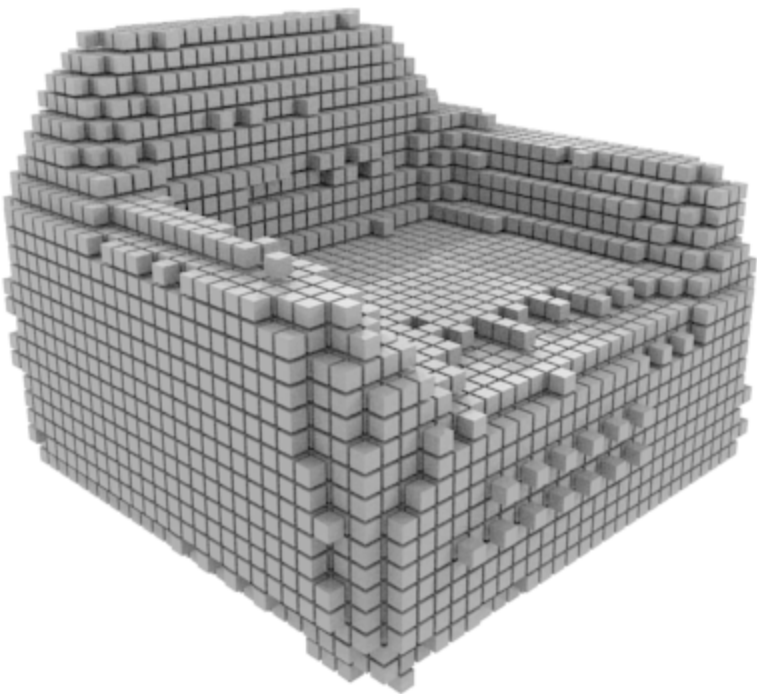

Supplement: result_from_pix2vox.zip [file cs-100114-pix2vox++be4c88a130e622a21961e650f3cfa396.pdf › result_from_pix2vox/cs-100114-pix2vox++be4c88a130e622a21961e650f3cfa396.pdf]

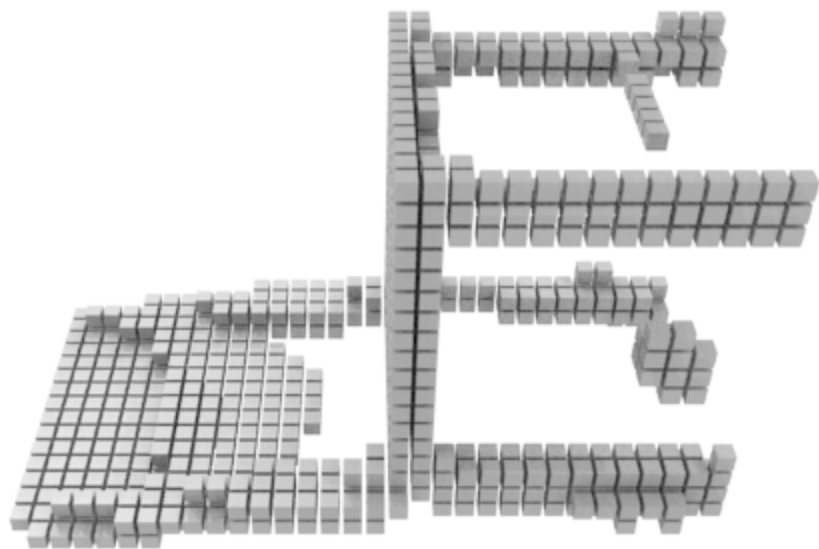

Supplement: result_from_pix2vox.zip [file cs-100114-pix2vox++chair.pdf › result_from_pix2vox/cs-100114-pix2vox++chair.pdf]

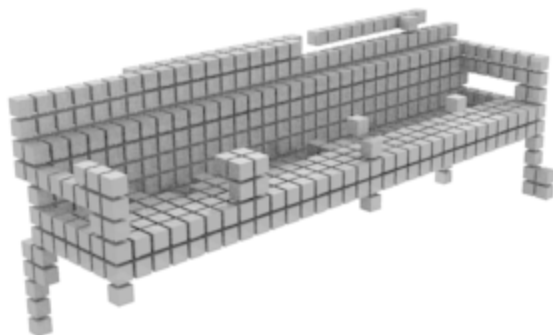

Supplement: result_from_pix2vox.zip [file cs-100114-pix2vox++longchair.pdf › result_from_pix2vox/cs-100114-pix2vox++longchair.pdf]

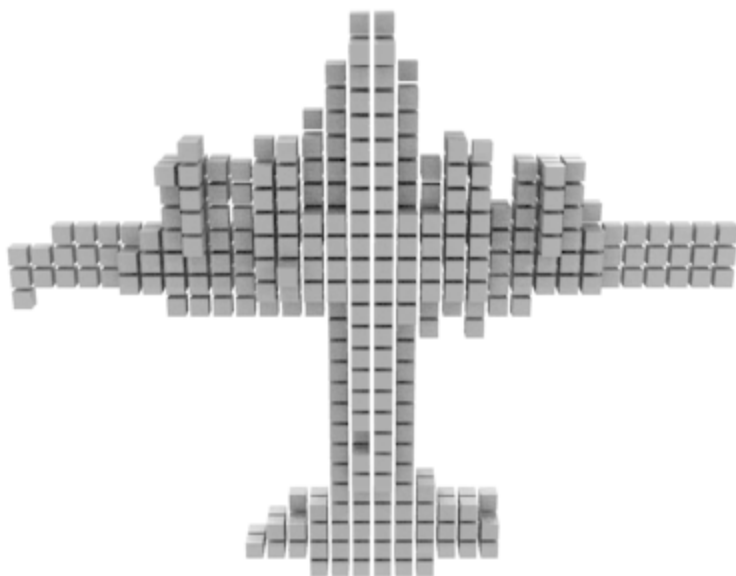

Supplement: result_from_pix2vox.zip [file cs-100114-pix2vox++plane.pdf › result_from_pix2vox/cs-100114-pix2vox++plane.pdf]

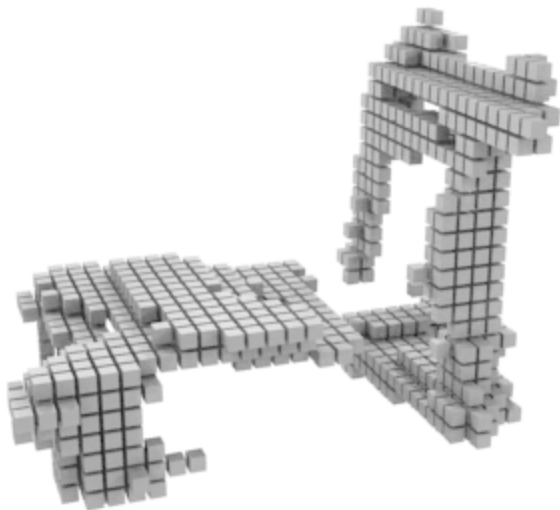

Supplement: result_from_pix2vox.zip [file cs-100114-pix3d_pix2vox++0.pdf › result_from_pix2vox/cs-100114-pix3d_pix2vox++0.pdf]

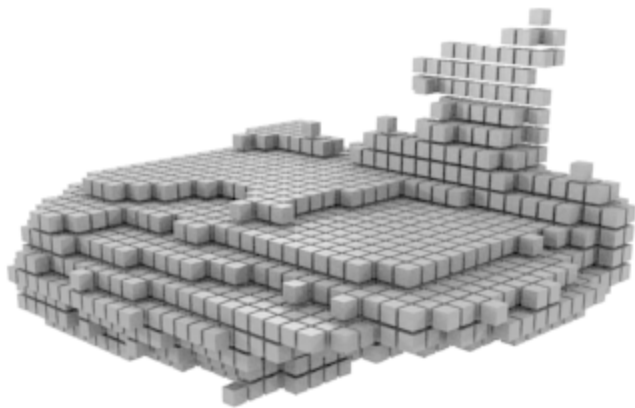

Supplement: result_from_pix2vox.zip [file cs-100114-pix3d_pix2vox++1.pdf › result_from_pix2vox/cs-100114-pix3d_pix2vox++1.pdf]

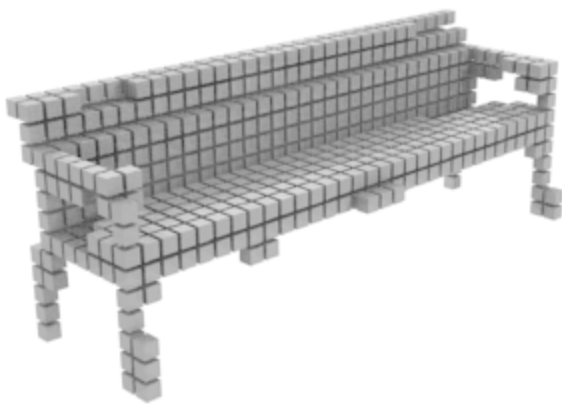

Supplement: result_from_umiformer.zip [file cs-100114-UMIFORMER_longchair.pdf › result_from_umiformer/cs-100114-UMIFORMER_longchair.pdf]

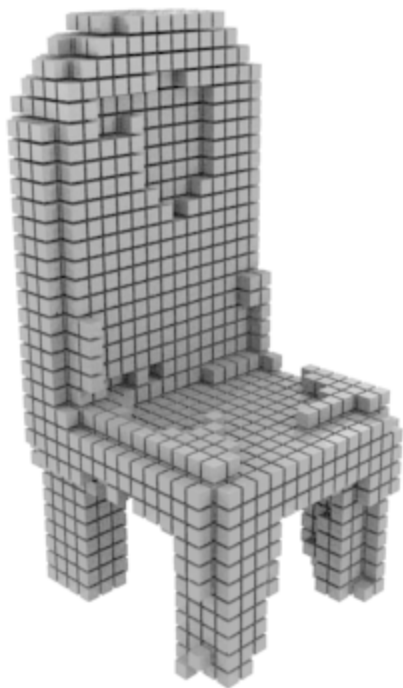

Supplement: result_from_umiformer.zip [file cs-100114-UMIFormer3b3a9f4e3aa9f2f4d39a194653571dfc.pdf › result_from_umiformer/cs-100114-UMIFormer3b3a9f4e3aa9f2f4d39a194653571dfc.pdf]

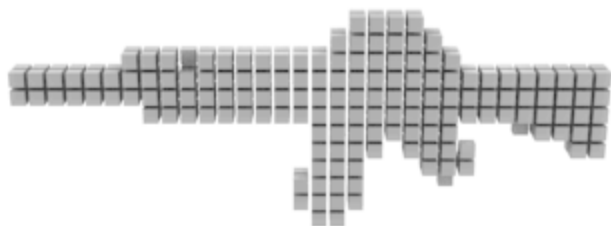

Supplement: result_from_umiformer.zip [file cs-100114-UMIFormer_rilfe.pdf › result_from_umiformer/cs-100114-UMIFormer_rilfe.pdf]

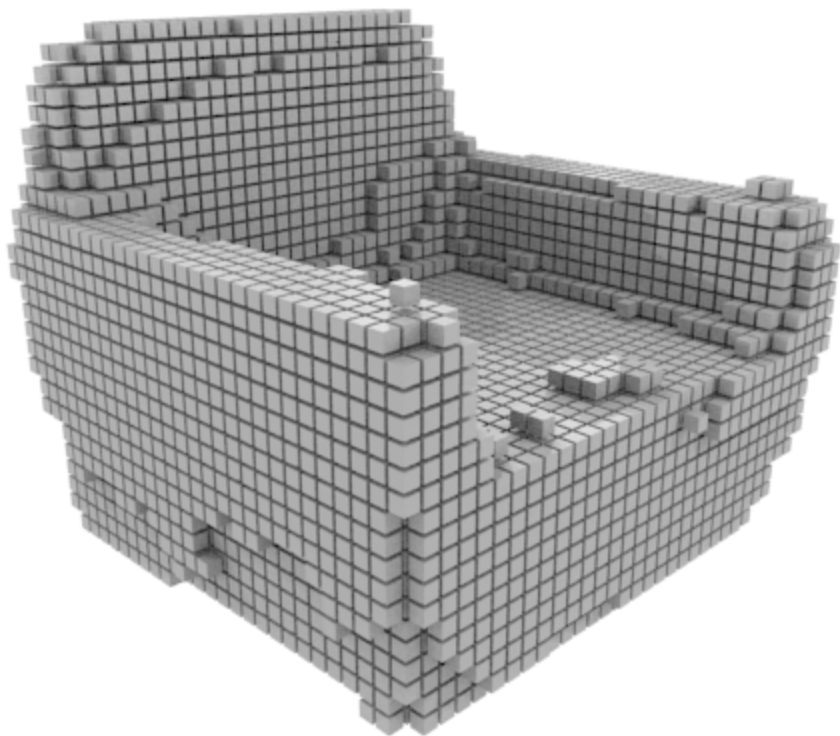

Supplement: result_from_umiformer.zip [file cs-100114-UMIFormerbe4c88a130e622a21961e650f3cfa396.binvox.pdf › result_from_umiformer/cs-100114-UMIFormerbe4c88a130e622a21961e650f3cfa396.binvox.pdf]

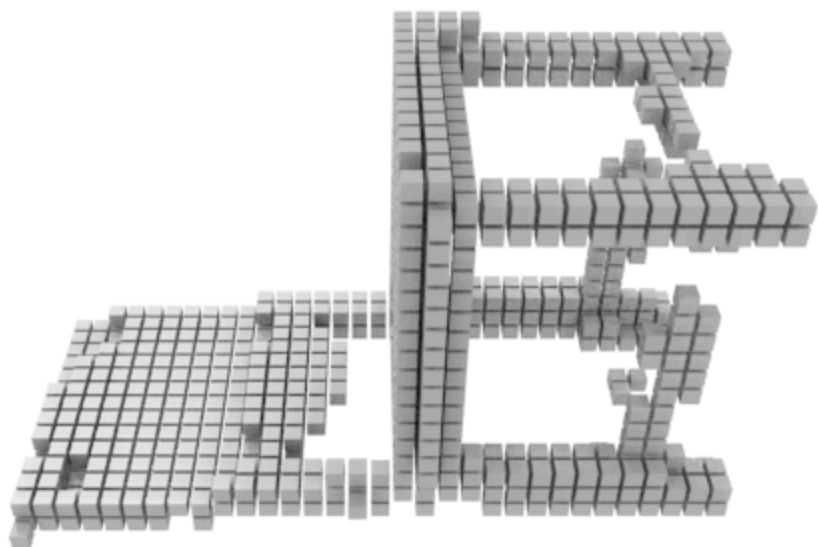

Supplement: result_from_umiformer.zip [file cs-100114-UMIFormerchair.pdf › result_from_umiformer/cs-100114-UMIFormerchair.pdf]

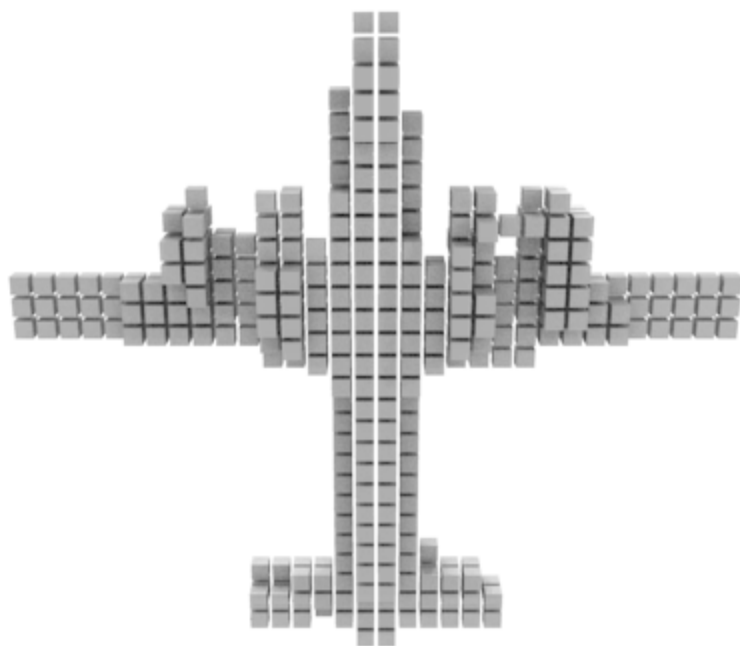

Supplement: result_from_umiformer.zip [file cs-100114-UMIformerplane.pdf › result_from_umiformer/cs-100114-UMIformerplane.pdf]

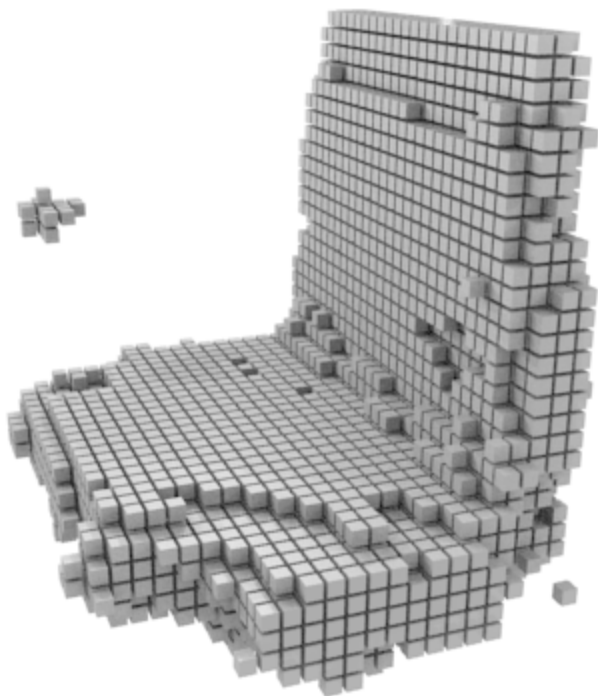

Supplement: result_from_umiformer.zip [file cs-100114-pix3d_UMIFormer0.pdf › result_from_umiformer/cs-100114-pix3d_UMIFormer0.pdf]

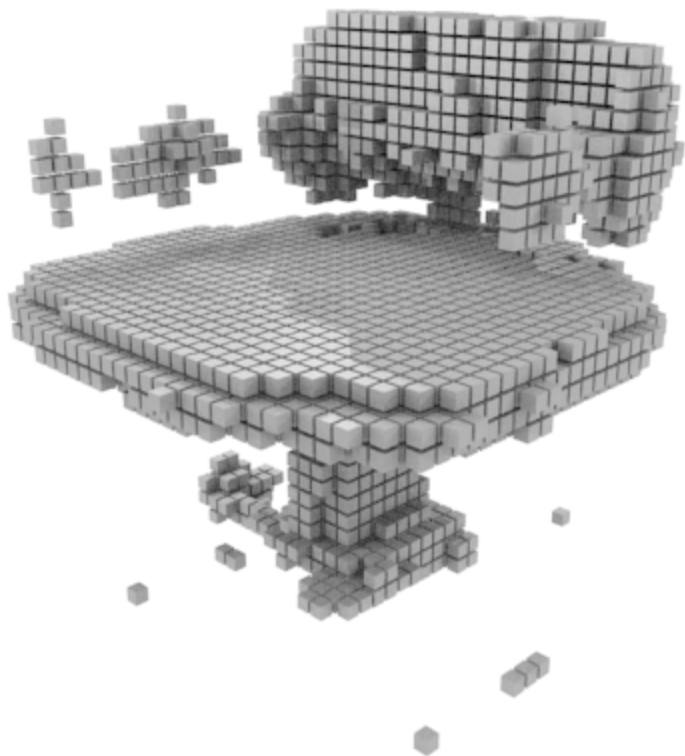

Supplement: result_from_umiformer.zip [file cs-100114-pix3d_UMIFormer1.pdf › result_from_umiformer/cs-100114-pix3d_UMIFormer1.pdf]
